# Supplementary material for: A High-Cholesterol Diet Increases Toll-like Receptors and Other Harmful Factors in the Rabbit Myocardium: The Beneficial Effect of Statins
Source: MDPI journal article supplement (doi:10.3390/cimb43020059), 2021-07-26
Supplement: s1 [file s1]

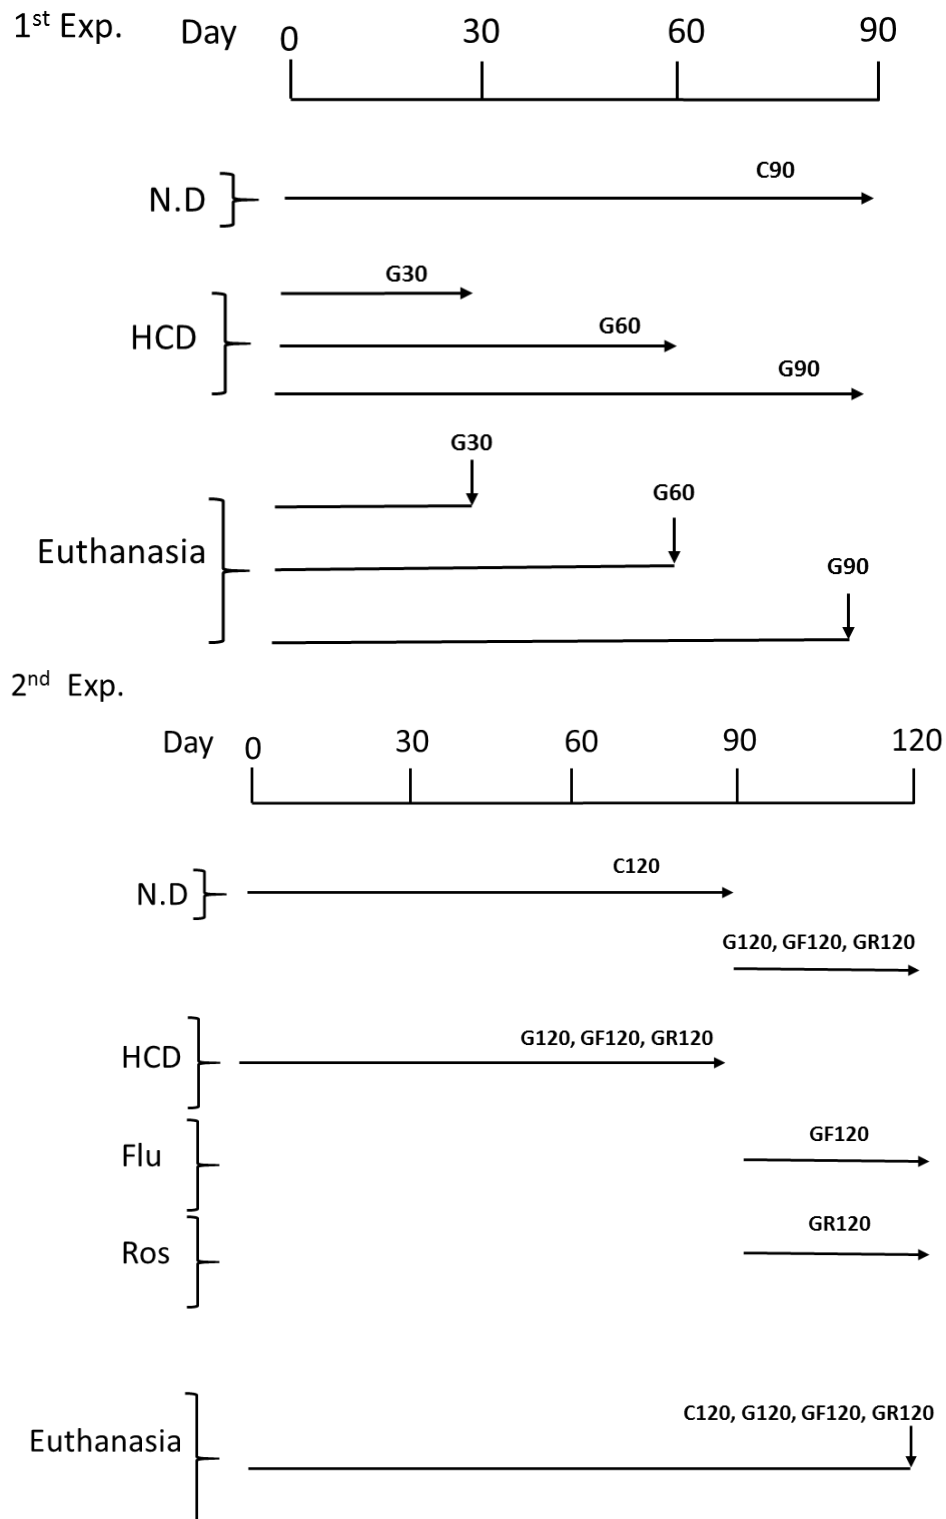

**Supplementary Figure S1.** Schematic figure representing the experimental protocol. First experiment describes the period of HCD intake; second experiment describes the use of the Flu and Ros. N.D, normal diet; HCD, high-cholesterol diet; Flu, fluvastatin; Ros, rosuvastatin.
